# Supplementary figures and images for: Development of Super-Ensemble techniques for ocean analyses: the Mediterranean Sea case
Source: Copernicus journal article supplement (doi:10.5194/nhess-2016-46), 2016-05-02

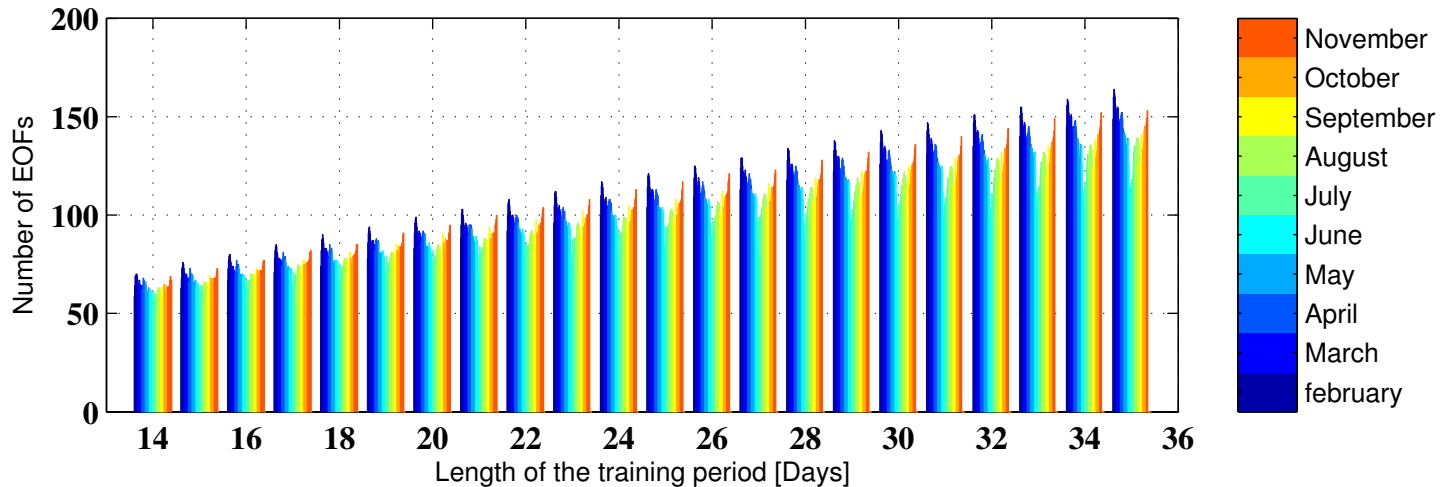

Supplement: Supplementary file 1 [file nhess-2016-46-supplement.zip]

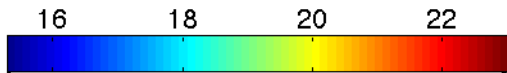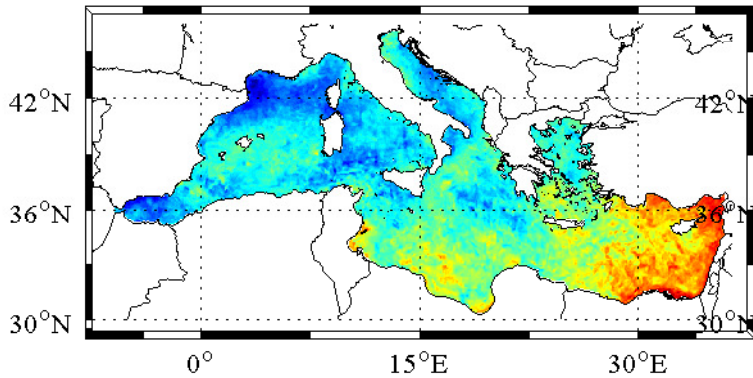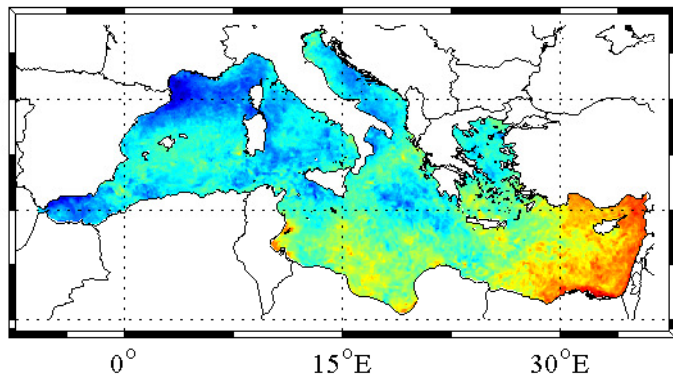

Supplement: Supplementary file 2 [file nhess-2016-46-supplement.zip]

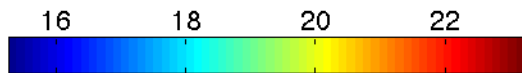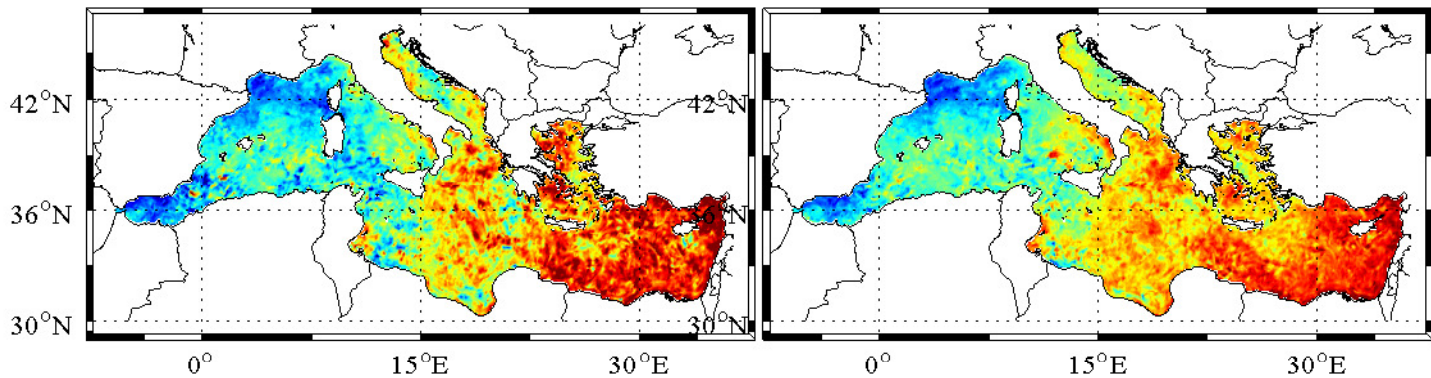

Supplement: Supplementary file 3 [file nhess-2016-46-supplement.zip]

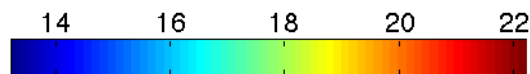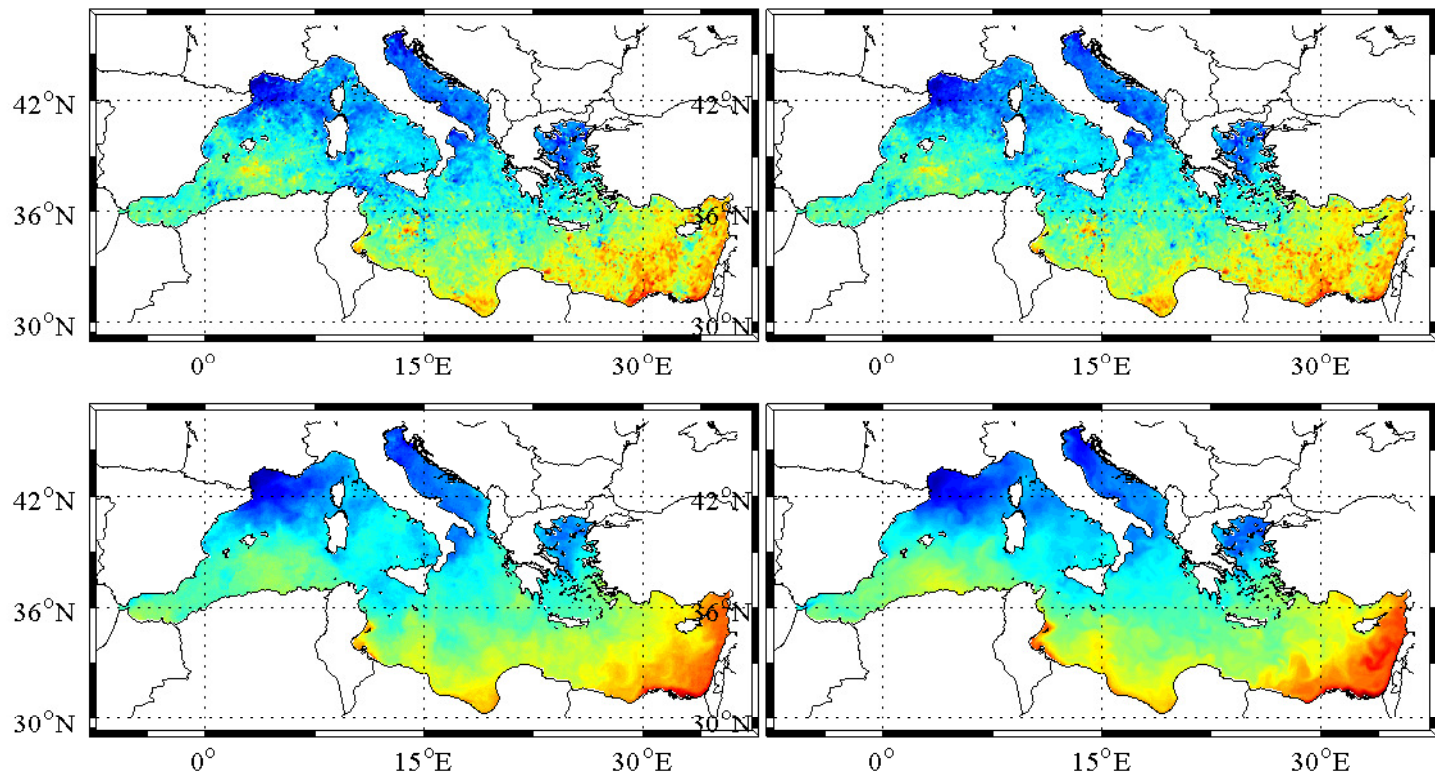

Supplement: Supplementary file 4 [file nhess-2016-46-supplement.zip]

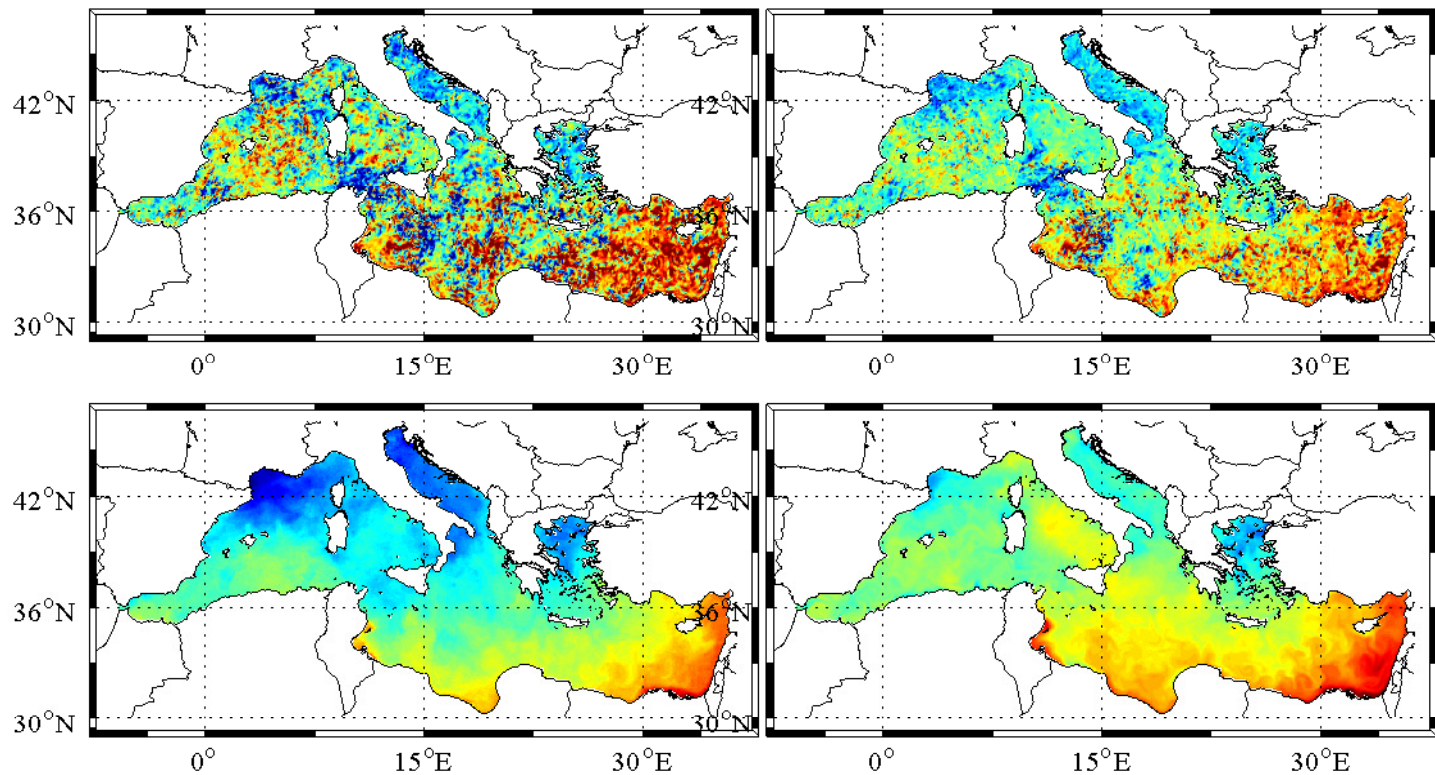

Supplement: Supplementary file 5 [file nhess-2016-46-supplement.zip]

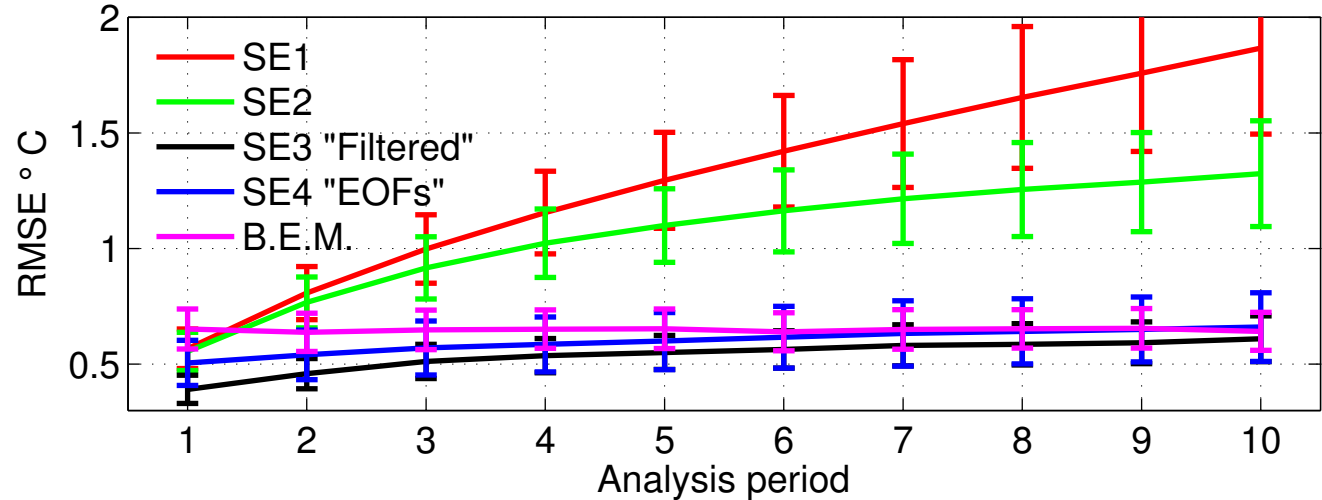

Supplement: Supplementary file 6 [file nhess-2016-46-supplement.zip]

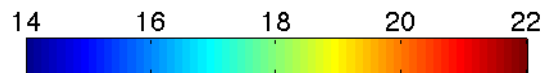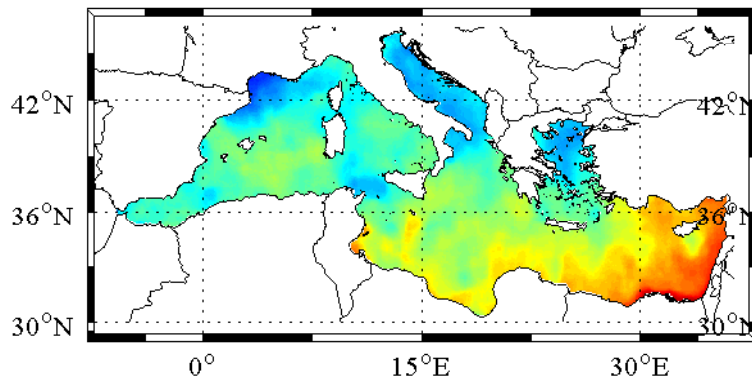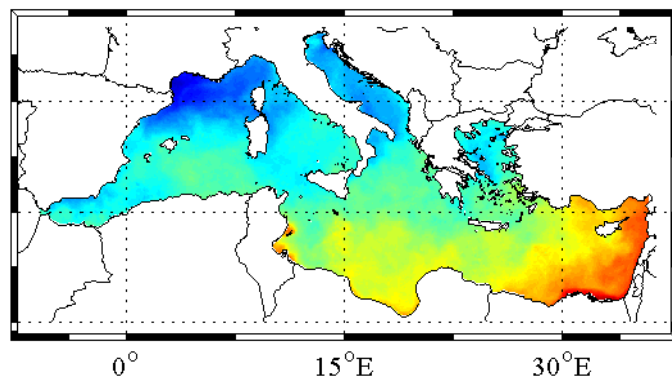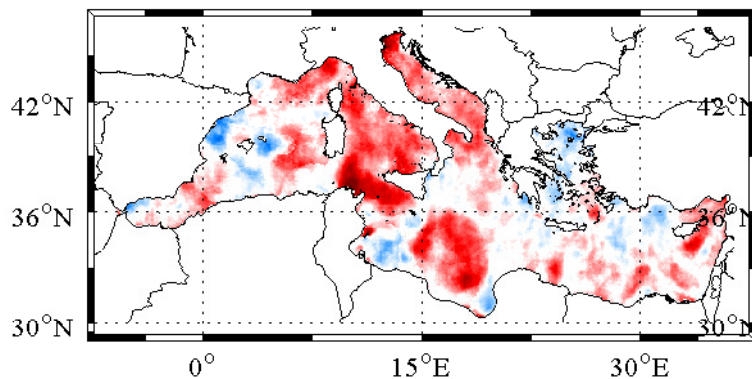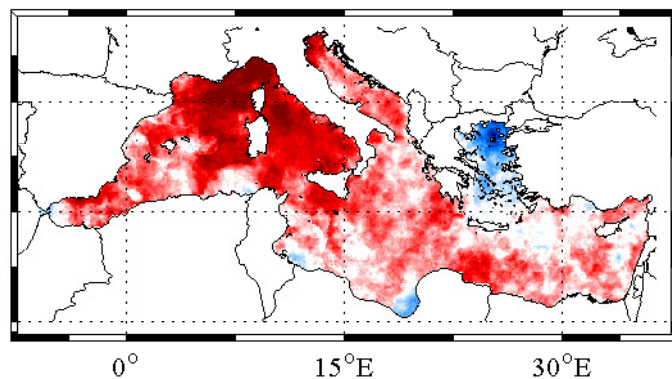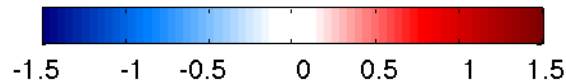

Supplement: Supplementary file 7 [file nhess-2016-46-supplement.zip]

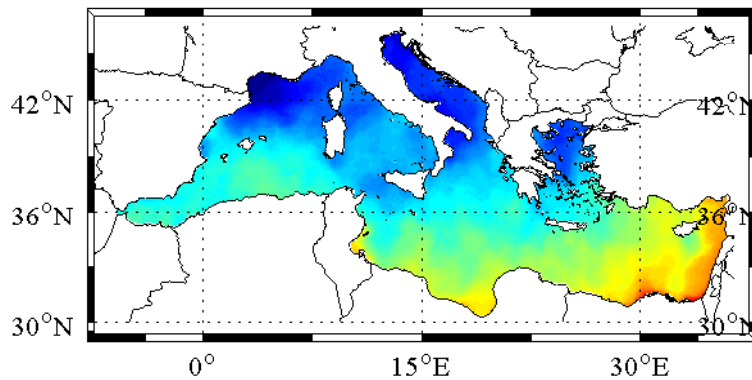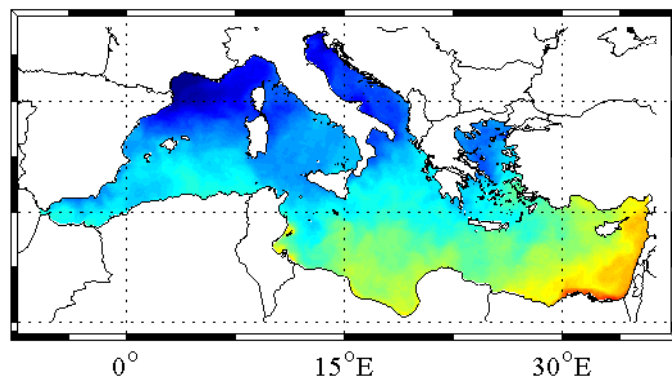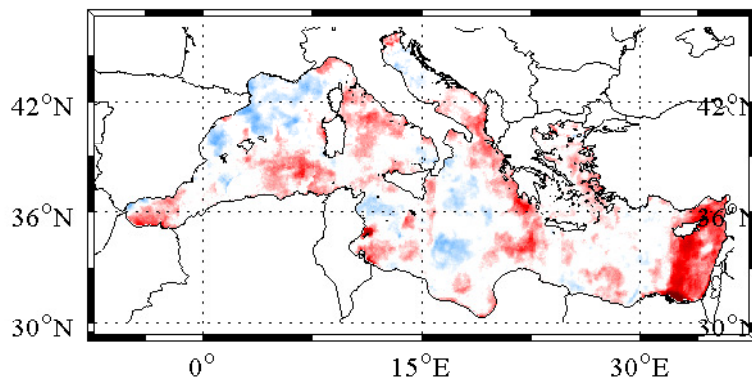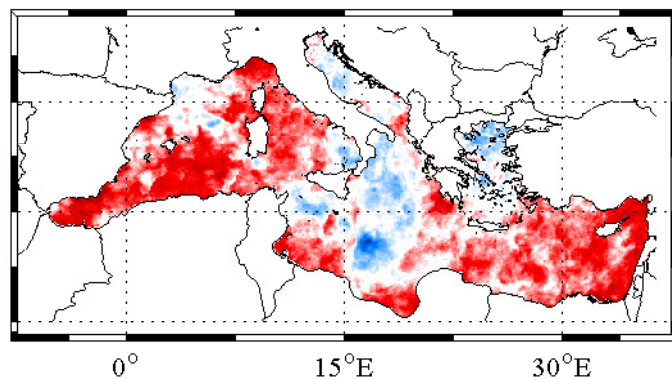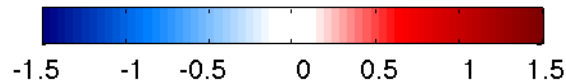

Supplement: Supplementary file 8 [file nhess-2016-46-supplement.zip]
